# Supplementary material
Source: PubMed Central journal article supplement (PMC6141939)
Supplement: DS_10.1177_1715163518779096.pdf [file DS_10.1177_1715163518779096.pdf]

## Appendix 1: Serotonin physiology

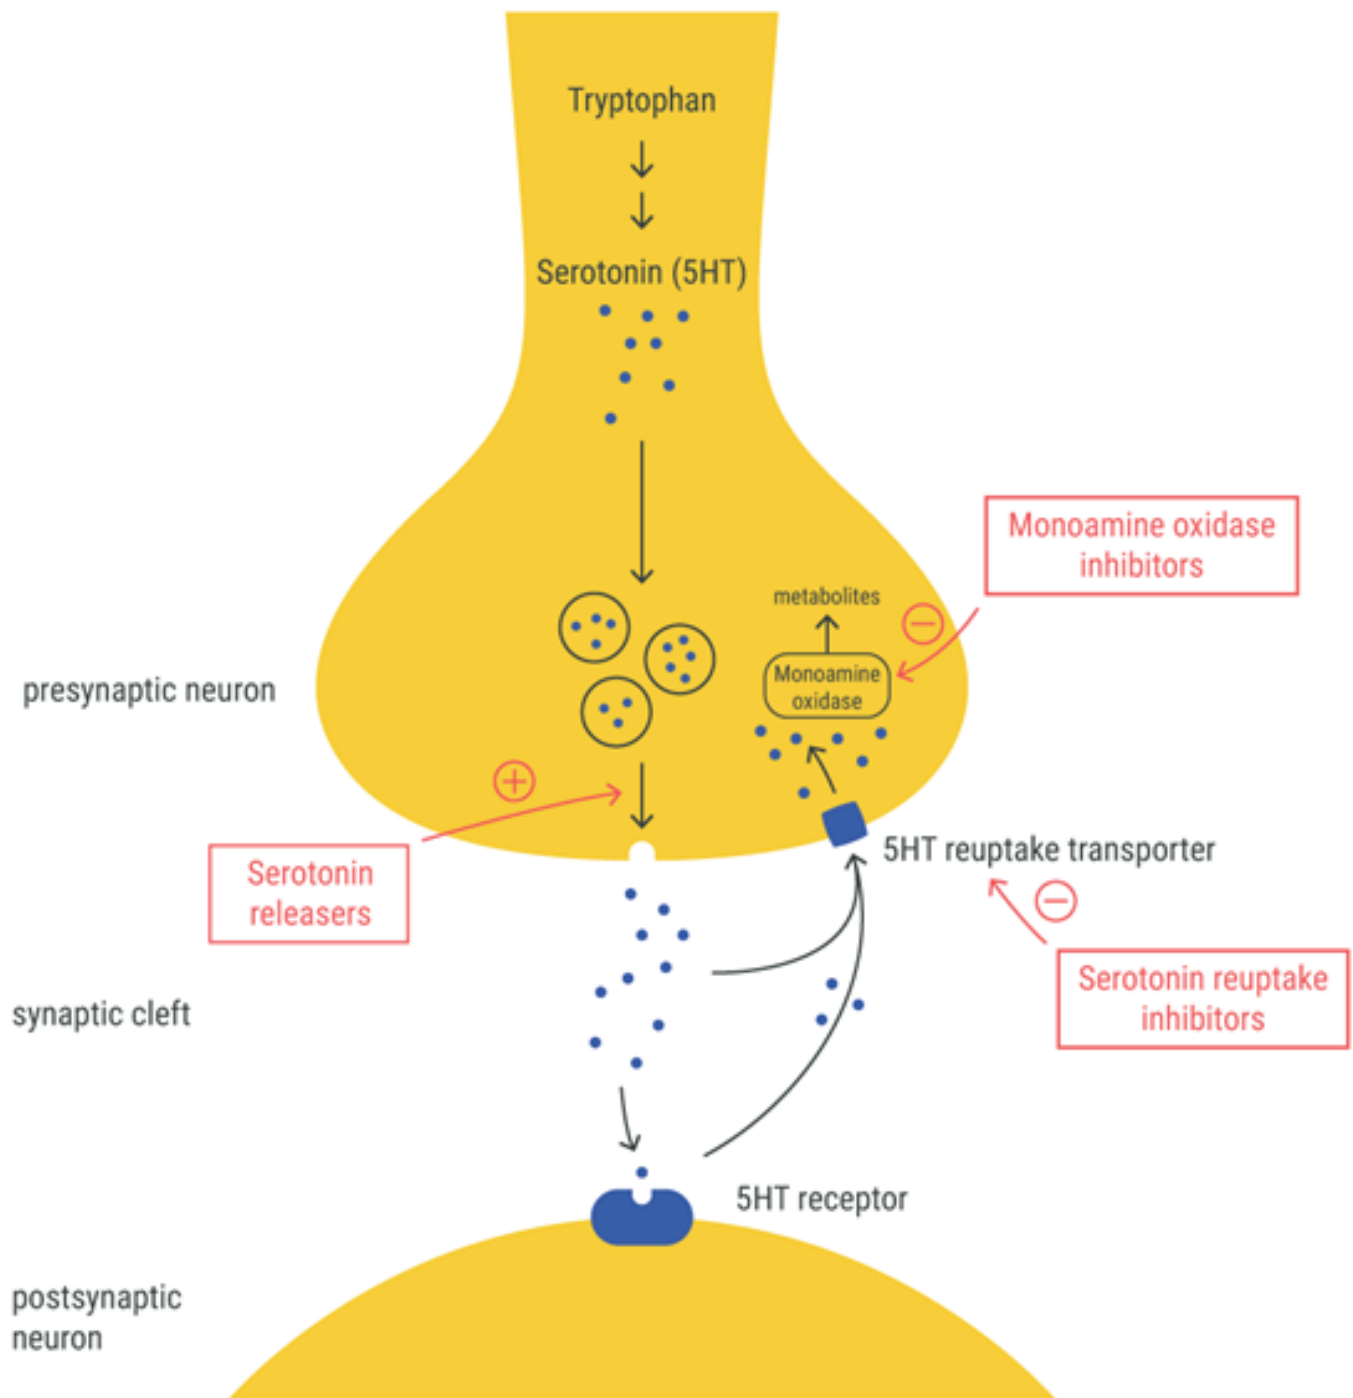

Serotonin is formed in the presynaptic terminal from the amino acid tryptophan. It is packed into vesicles and released into the synaptic cleft where it acts on receptors on the postsynaptic terminal. It is transported from the synaptic cleft to the presynaptic terminal where it is degraded by monoamine oxidase. The 3 types of drugs that can increase serotonin are highlighted in red.
